# Supplementary material for: Switching in the expression pattern of actin isoforms marks the onset of contractility and distinct mechanodynamic behavior during cardiomyocyte differentiation
Source: Physiol Rep. 2022 Feb 14;10(3):e15171. doi: 10.14814/phy2.15171 (PMC8844573; doi:10.14814/phy2.15171)
Supplement: Supplementary file 1 — Supplementary Material [file PHY2-10-e15171-s002.pdf]

# SUPPLEMENTARY INFORMATION

## Title

**Switching in the expression pattern of actin isoforms marks the onset of contractility and distinct mechanodynamic behavior during cardiomyocyte differentiation**

## *Running Title*

Cell stiffness during cardiomyocyte differentiation.

## Authors

Ricardo H. Pires<sup>1,2\*</sup>, Tung H. Dau<sup>1,3</sup>, Emmanuel Manu<sup>1,2</sup>, Nithya Shree<sup>1</sup> and Oliver Otto<sup>1,2\*</sup>

## *Affiliation*

<sup>1</sup>ZIK-HIKE - Zentrum für Innovationskompetenz: Humorale Immunreaktionen bei kardiovaskulären Erkrankungen, Universität Greifswald, Fleischmannstr. 42, 17489 Greifswald, Germany

<sup>2</sup>DZHK - Deutsches Zentrum für Herz-Kreislaufforschung, Partner Site Greifswald, Fleischmannstr. 9, 17489 Greifswald.

<sup>3</sup>FLI - Friedrich-Loeffler-Institut, Südufer 10, 17493 Greifswald, Insel Riems, Germany.

## *Correspondence*

\* Ricardo H. Pires ([piresr@uni-greifswald.de](mailto:piresr@uni-greifswald.de)) and Oliver Otto ([oliver.otto@uni-greifswald.de](mailto:oliver.otto@uni-greifswald.de)).

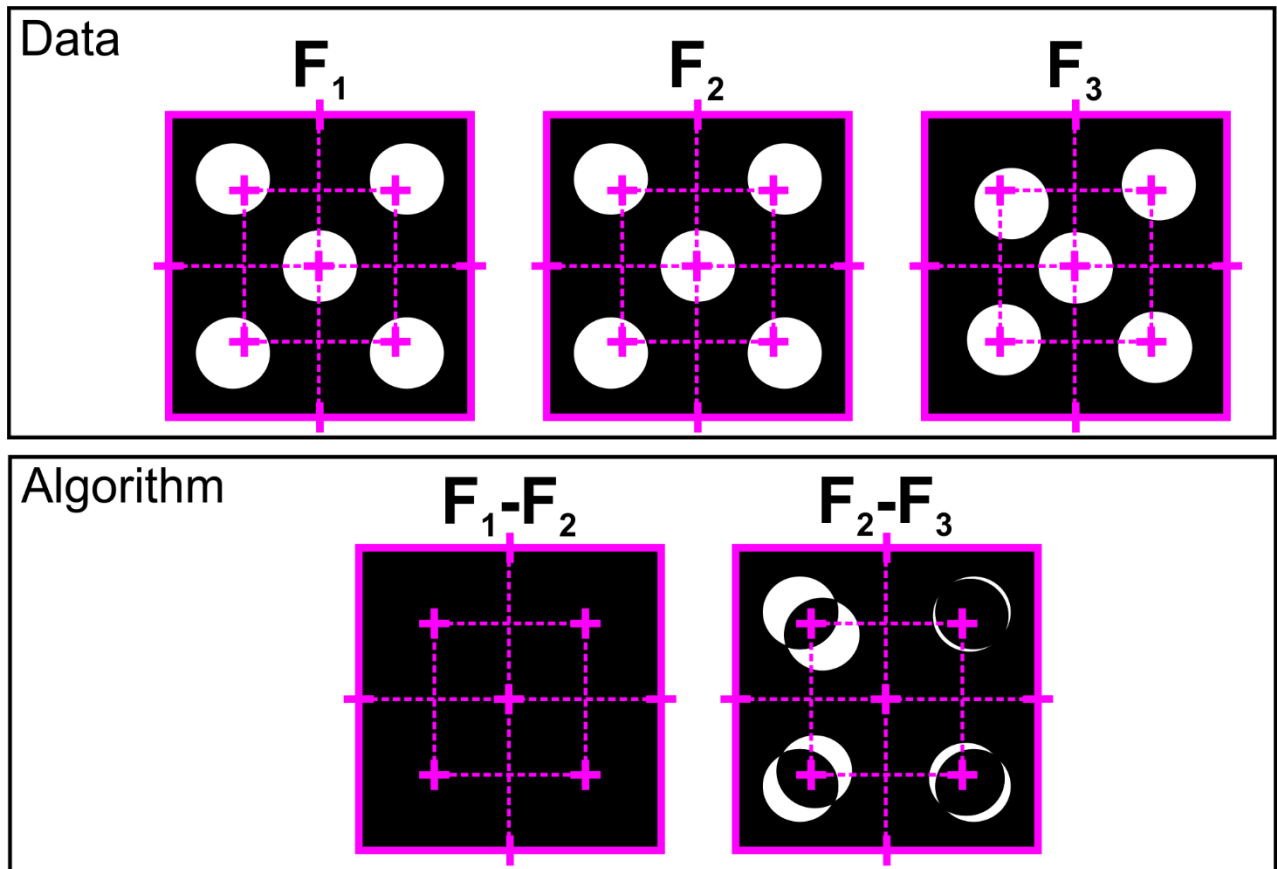

**Supplemental Figure 1:** Diagram illustrating the concept of motion detection implemented in this work.

The algorithm is based on difference in pixel grayscale intensity between consecutive frames. (above) Five circular objects imaged in  $F_1$  and  $F_2$  do not change their position, but some move from  $F_2$  to  $F_3$ . (below) The output of the algorithm shows an image with pixels with grayscale intensities with values close to zero in the absence of motion ( $F_1-F_2$ ), and non-zero when displacements occur ( $F_2-F_3$ ).

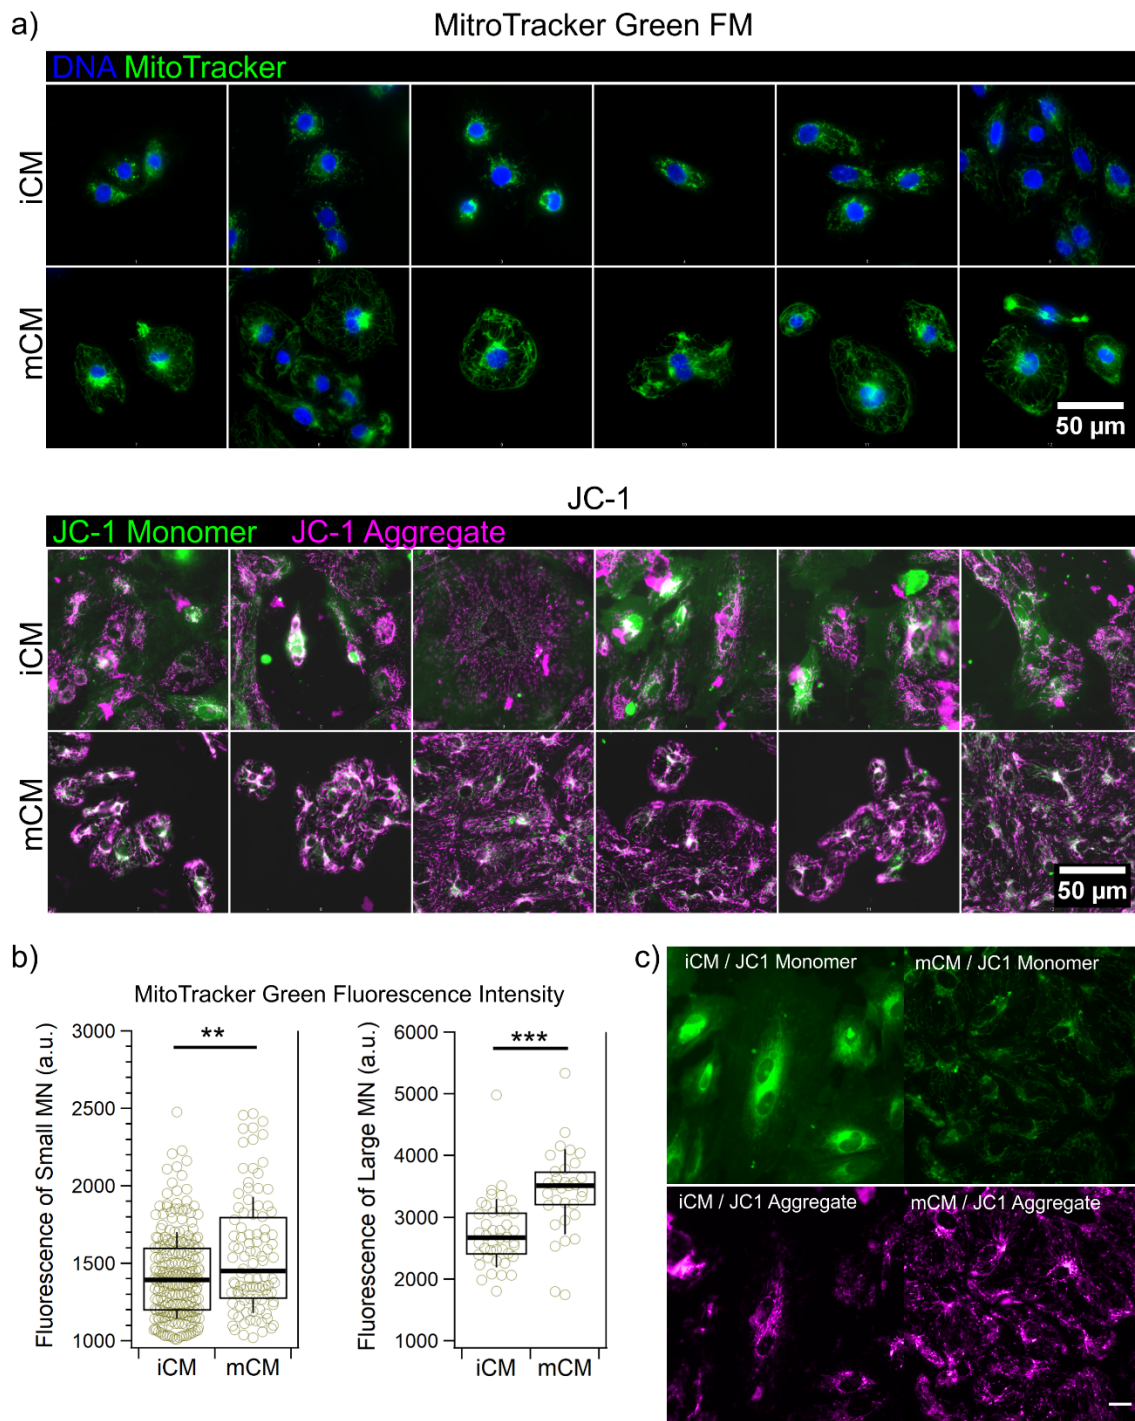

**Supplemental Figure 2: Live cell fluorescence imaging of mitochondria.**

- Gallery of cells imaged with Mitotracker Green FM (top) and composite images of cells labeled with JC-1 mitochondrial probe (bottom).
- Both large and small mitochondrial networks (MN) also show differences in mitotracker green fluorescence intensity between iCM and mCM possibly due to differences in their intracellular density.
- Single channel images of the composite image of JC-1 labeled cells shown in the main part of the manuscript in **Figure 2c**.

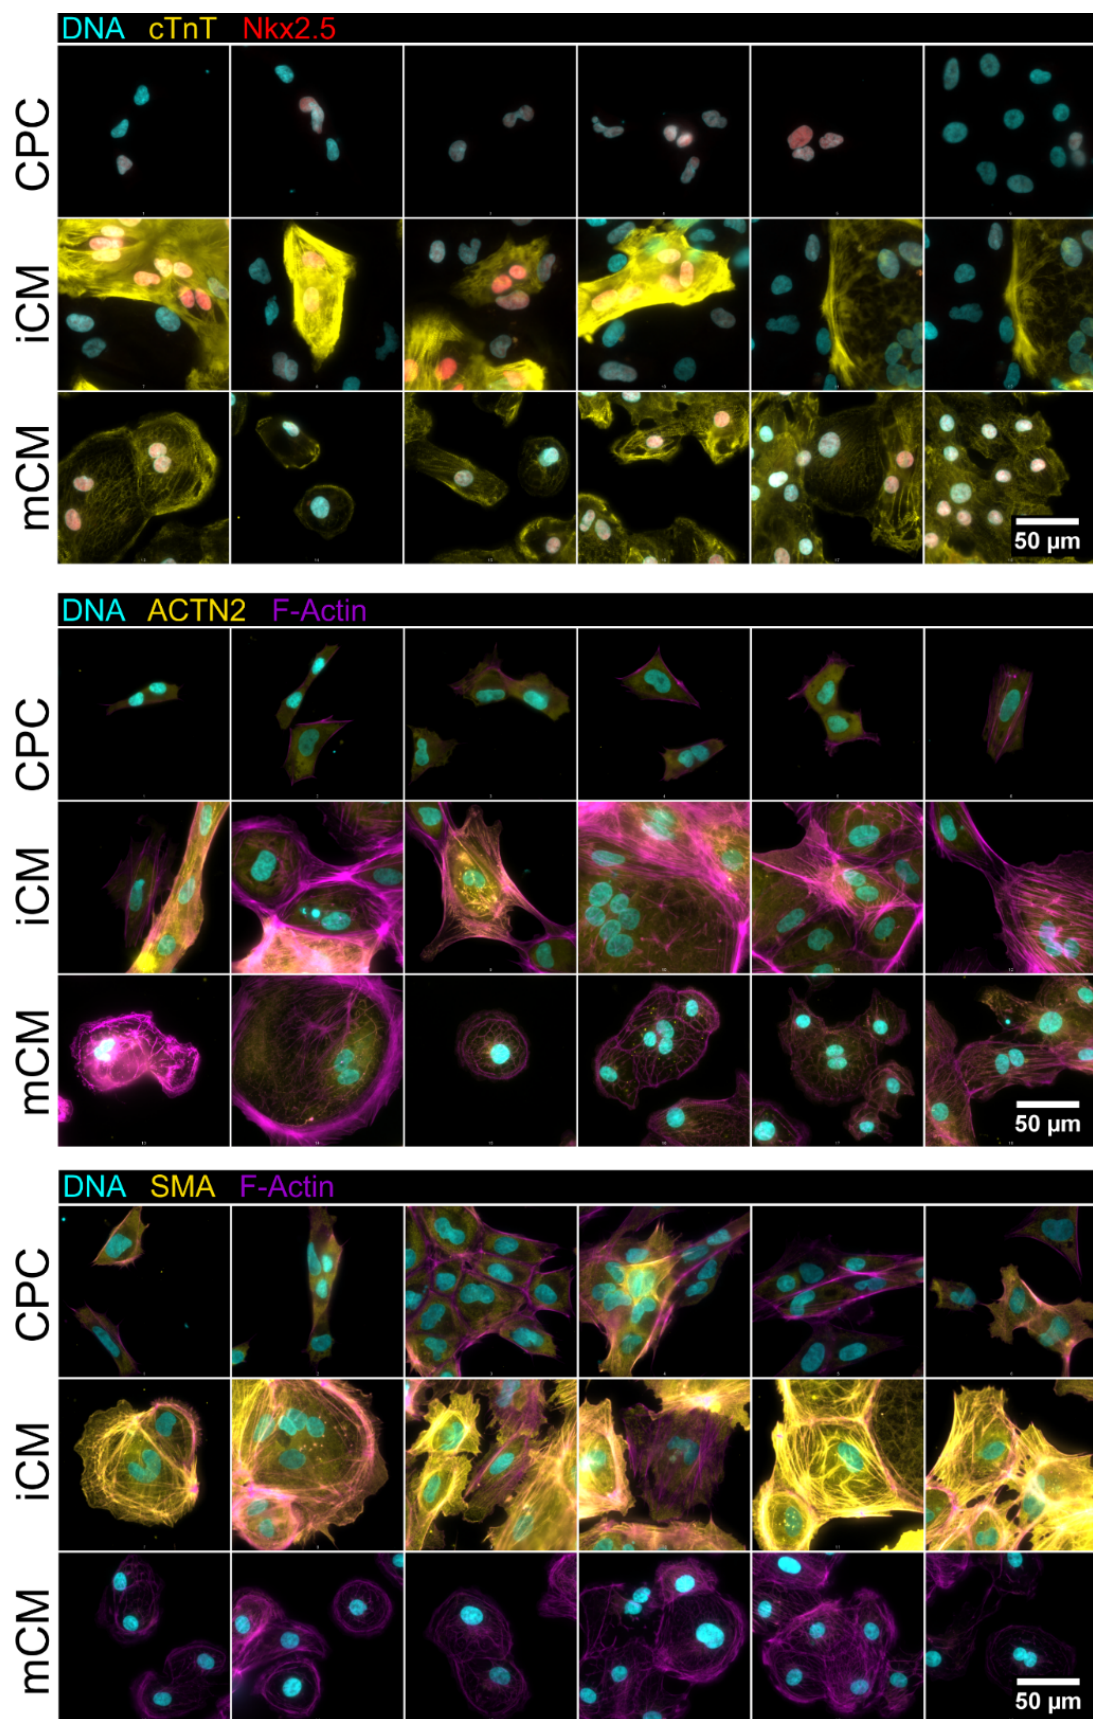

**Supplemental Figure 3: Expression of cytoskeletal proteins.** Gallery of images displaying the differences in the expression level of different proteins.

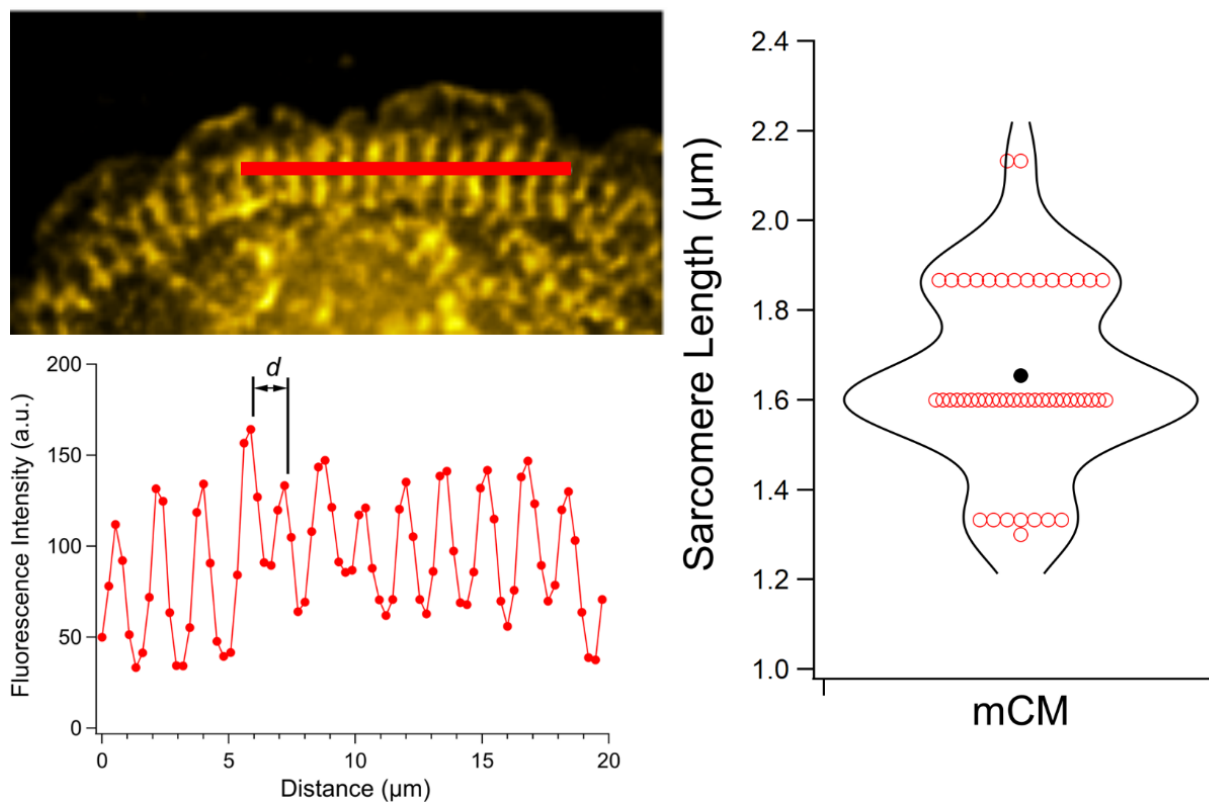

**Supplemental Figure 4: Measurement of sarcomere length in mCM.** A typical measurement of sarcomere length in mCM labeled with anti-cardiac sarcomeric  $\alpha$ -actinin (top left) results in a corrugated fluorescence intensity profile (bottom left). Measurements of distance ( $d$ ) between peaks is indicative of the distance between Z-disks, or the unit length of a sarcomere, which in the case of mCM is  $1.65 \pm 0.03 \mu\text{m}$  (mean  $\pm$  s.e.m,  $n = 49$ ) and ranged between 1.3 and 2.1  $\mu\text{m}$  (right).

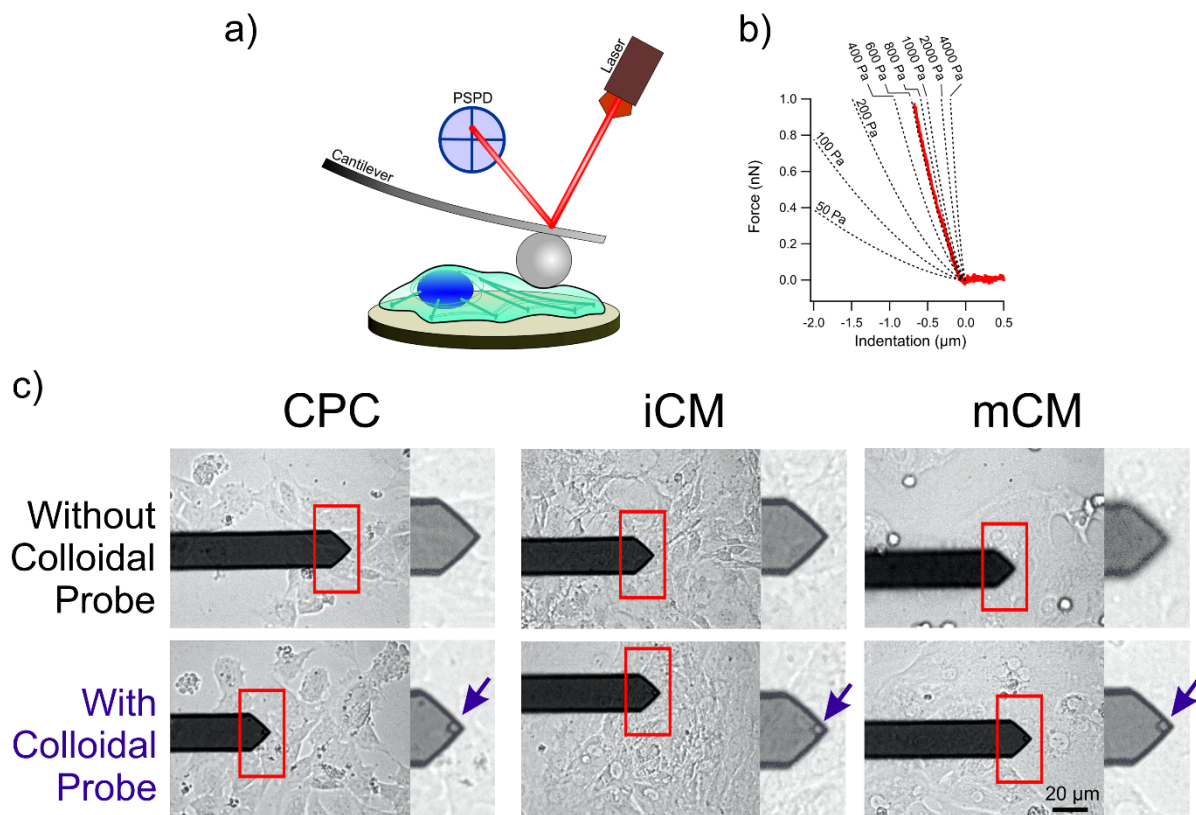

**Supplemental Figure 5: AFM colloidal force spectroscopy indentation experiments.**

- Cells are pressed with a spherical indenter placed at the extremity of a flexible cantilever. Bending of the cantilever as it presses on the sample is monitored via a laser deflected from the back of the cantilever onto a position sensitive photodiode (PSPD). Calibration of the cantilever ensures that bending can be expressed as indentation force.
- Example of a typical single indentation event on a cell (red) graphed along isoelasticity lines (dashed) derived from the Hertz contact model (see Methods) for different Young's moduli, from 50 Pa up to 4000 Pa.
- Indentation experiments were performed with a colloidal probe whose presence (arrows) could be monitored during data acquisition.

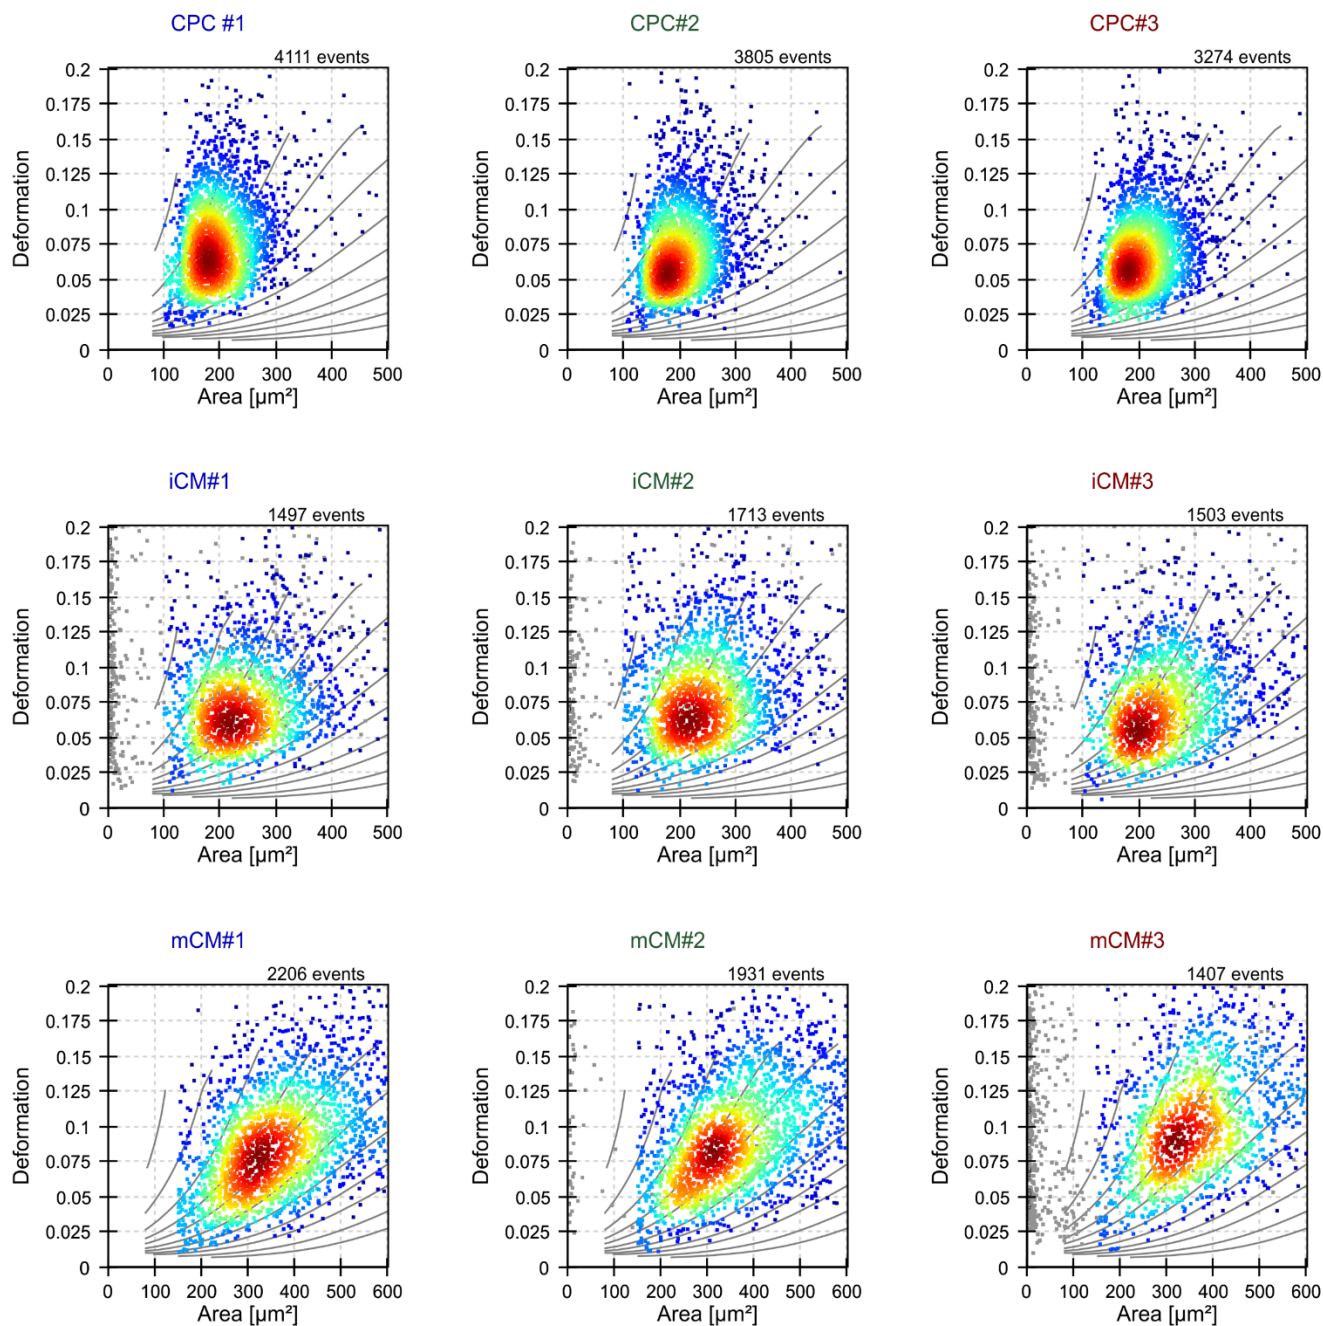

**Supplemental Figure 6: Data plots obtained from real-time deformability cytometry (RT-DC) measurements.**

Cell size (area) and cell deformation are measured in real-time through image analysis and the data is used to calculate the Young's modulus of cells shown as dots in the scatter-plots.

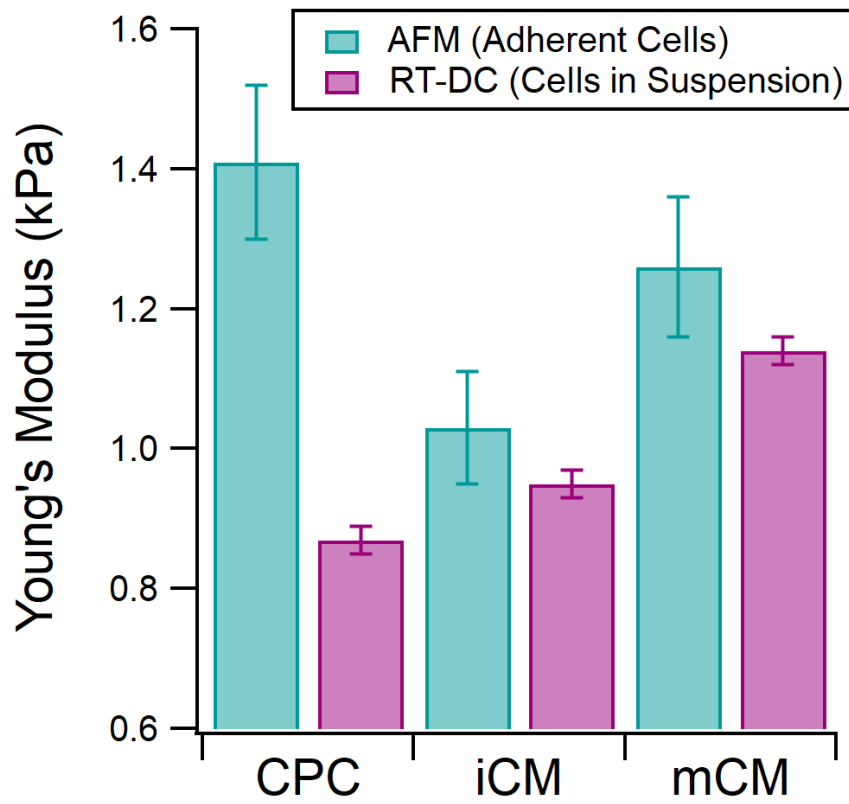

**Supplemental Figure 7:** Side-by-side comparison of the Young's modulus determined by AFM and RT-DC for cardiac progenitor cells (CPC), immature cardiomyocyte (iCM) and more differentiated cardiomyocytes (mCM).

**Supplemental Table 1. Summary of AFM colloidal force spectroscopy indentation data.**

Complete data was collected on two independent experiment replicates (A and B) for each of the cell type for any of the three conditions: negative control (control), vehicle control (DMSO) and 1  $\mu$ M Cytochalasin D (CytoD). Data was filtered based on the fit residual root mean square ( $< 25$  pN) and deviations in contact point between model and data ( $< 100$  nm) resulting in an inclusion rate (Inc. Rate) that varied between 0.32 and 0.90. For each replicate, a total number (n) of force-indentations curves were used to calculate the mean Young's modulus (Mean YM) and associated standard error of the mean (s.e.m.).

| Cell Type | Condition | Replicate | n   | Inc. Rate | Mean YM (Pa) | s.e.m. (Pa) |
|-----------|-----------|-----------|-----|-----------|--------------|-------------|
| CPC       | Control   | A         | 101 | 0.49      | 1600         | 161         |
| CPC       | Control   | B         | 107 | 0.57      | 2431         | 177         |
| CPC       | DMSO      | A         | 116 | 0.59      | 2482         | 212         |
| CPC       | DMSO      | B         | 146 | 0.67      | 2152         | 152         |
| CPC       | CytoD     | A         | 64  | 0.37      | 662          | 70          |
| CPC       | CytoD     | B         | 51  | 0.40      | 714          | 224         |
| iCM       | Control   | A         | 185 | 0.76      | 1831         | 453         |
| iCM       | Control   | B         | 132 | 0.54      | 1682         | 159         |
| iCM       | DMSO      | A         | 65  | 0.45      | 2345         | 280         |
| iCM       | DMSO      | B         | 133 | 0.60      | 2299         | 176         |
| iCM       | CytoD     | A         | 97  | 0.44      | 307          | 17          |
| iCM       | CytoD     | B         | 102 | 0.53      | 737          | 157         |
| mCM       | Control   | A         | 71  | 0.32      | 1534         | 123         |
| mCM       | Control   | B         | 147 | 0.80      | 2212         | 232         |
| mCM       | DMSO      | A         | 243 | 0.90      | 2107         | 223         |
| mCM       | DMSO      | B         | 175 | 0.69      | 1854         | 134         |
| mCM       | CytoD     | A         | 173 | 0.82      | 1671         | 193         |
| mCM       | CytoD     | B         | 159 | 0.80      | 2242         | 204         |
